# Supplementary material for: A new potential natural chalcopyrite reference material for in situ copper isotope microanalysis
Source: Royal Society of Chemistry journal article supplement (doi:10.1039/d3ja00105a), 2023-01-01
Supplement: d3ja00105a1.pdf [file d3ja00105a1.pdf]

Table S1 Separation scheme of Cu

| Separation stage                   | Reagent                                            | Volume (mL) |
|------------------------------------|----------------------------------------------------|-------------|
| Resin: 2 mL AG-MP-1M, 100-200 mesh |                                                    |             |
| Cleaning resin                     | 0.5 mol/L HNO <sub>3</sub>                         | 30          |
| Cleaning resin                     | deionized water                                    | 30          |
| Conditioning                       | 6 mol/L HCl + 0.001% H <sub>2</sub> O <sub>2</sub> | 10          |
| Sample loading                     | 6 mol/L HCl + 0.001% H <sub>2</sub> O <sub>2</sub> | 1           |
| Elution of matrix,                 | 6 mol/L HCl + 0.001% H <sub>2</sub> O <sub>2</sub> | 5           |
| Elution of Cu                      | 6 mol/L HCl + 0.001% H <sub>2</sub> O <sub>2</sub> | 26          |
| Cleaning resin                     | 6 mol/L HCl + 0.001% H <sub>2</sub> O <sub>2</sub> | 1           |
| Cleaning resin                     | 0.5 mol/L HNO <sub>3</sub>                         | 10          |
| Cleaning resin                     | deionized water                                    | 10          |

Table S2 Element concentrations (wt%) of the TQ-Ccp chalcopyrite measured by EPMA

| Spot No. | Fragment ID | Element concentrations (wt%) |       |       |      |      |      | Total  |
|----------|-------------|------------------------------|-------|-------|------|------|------|--------|
|          |             | Cu                           | Fe    | S     | Pb   | Co   | Ni   |        |
| 1        | TQ-Ccp -1   | 34.05                        | 30.40 | 34.89 | 0.00 | 0.03 | 0.00 | 99.36  |
| 2        |             | 34.29                        | 30.43 | 34.59 | 0.00 | 0.05 | 0.00 | 99.36  |
| 3        |             | 34.44                        | 29.98 | 34.72 | 0.00 | 0.04 | 0.00 | 99.17  |
| 4        | TQ-Ccp-2    | 34.74                        | 30.14 | 34.72 | 0.05 | 0.07 | 0.00 | 99.70  |
| 5        |             | 34.90                        | 30.04 | 34.43 | 0.00 | 0.04 | 0.00 | 99.42  |
| 6        |             | 34.54                        | 30.61 | 34.60 | 0.00 | 0.04 | 0.00 | 99.80  |
| 7        | TQ-Ccp-3    | 33.35                        | 30.89 | 34.85 | 0.00 | 0.04 | 0.02 | 99.15  |
| 8        |             | 34.72                        | 30.83 | 34.59 | 0.05 | 0.07 | 0.02 | 100.28 |
| 9        |             | 33.95                        | 30.09 | 34.71 | 0.00 | 0.07 | 0.00 | 98.81  |
| 10       | TQ-Ccp-4    | 34.40                        | 30.49 | 34.45 | 0.00 | 0.05 | 0.00 | 99.38  |
| 11       |             | 33.78                        | 30.52 | 34.50 | 0.00 | 0.03 | 0.01 | 98.83  |
| 12       |             | 33.79                        | 31.08 | 34.21 | 0.00 | 0.06 | 0.00 | 99.15  |
| 13       | TQ-Ccp-5    | 34.26                        | 29.88 | 34.58 | 0.07 | 0.01 | 0.00 | 98.80  |
| 14       |             | 34.02                        | 30.17 | 35.20 | 0.03 | 0.03 | 0.00 | 99.45  |
| 15       |             | 33.18                        | 31.17 | 34.61 | 0.03 | 0.03 | 0.00 | 99.03  |
| 16       | TQ-Ccp-6    | 35.06                        | 29.68 | 34.65 | 0.02 | 0.04 | 0.00 | 99.44  |
| 17       |             | 34.47                        | 30.51 | 34.50 | 0.00 | 0.06 | 0.02 | 99.55  |
| 18       |             | 34.77                        | 29.61 | 34.49 | 0.01 | 0.06 | 0.01 | 98.94  |
| 19       | TQ-Ccp-7    | 34.30                        | 29.82 | 34.75 | 0.08 | 0.06 | 0.00 | 99.00  |
| 20       |             | 33.81                        | 31.02 | 34.93 | 0.00 | 0.04 | 0.00 | 99.81  |
| 21       |             | 34.09                        | 31.00 | 34.41 | 0.00 | 0.02 | 0.00 | 99.52  |
| 22       | TQ-Ccp-8    | 33.94                        | 30.81 | 34.29 | 0.00 | 0.02 | 0.00 | 99.06  |
| 23       |             | 34.22                        | 30.76 | 34.94 | 0.00 | 0.03 | 0.00 | 99.95  |
| 24       |             | 34.35                        | 30.77 | 34.70 | 0.00 | 0.02 | 0.01 | 99.84  |
| 25       | TQ-Ccp-9    | 33.87                        | 30.27 | 34.87 | 0.00 | 0.05 | 0.00 | 99.06  |
| 26       |             | 34.20                        | 30.31 | 34.71 | 0.00 | 0.04 | 0.00 | 99.26  |
| 27       |             | 34.44                        | 31.12 | 34.23 | 0.00 | 0.06 | 0.00 | 99.84  |
| 28       | TQ-Ccp-10   | 34.47                        | 29.81 | 35.23 | 0.00 | 0.03 | 0.00 | 99.53  |
| 29       |             | 33.33                        | 30.99 | 34.78 | 0.00 | 0.08 | 0.01 | 99.20  |
| 30       |             | 34.03                        | 30.67 | 34.78 | 0.06 | 0.05 | 0.03 | 99.62  |
| 31       | TQ-Ccp-11   | 35.39                        | 29.77 | 34.77 | 0.03 | 0.04 | 0.00 | 99.99  |
| 32       |             | 34.57                        | 29.85 | 34.54 | 0.01 | 0.04 | 0.00 | 99.01  |
| 33       |             | 33.64                        | 30.54 | 34.62 | 0.00 | 0.07 | 0.03 | 98.90  |
| 34       | TQ-Ccp-12   | 33.89                        | 30.81 | 34.73 | 0.00 | 0.07 | 0.00 | 99.51  |
| 35       |             | 34.34                        | 29.73 | 34.58 | 0.00 | 0.05 | 0.00 | 98.69  |
| 36       |             | 34.36                        | 30.43 | 34.10 | 0.07 | 0.04 | 0.00 | 98.99  |
| 37       | TQ-Ccp-13   | 34.58                        | 29.88 | 34.59 | 0.08 | 0.02 | 0.00 | 99.16  |
| 38       |             | 33.02                        | 30.97 | 34.75 | 0.00 | 0.06 | 0.02 | 98.82  |
| 39       |             | 34.72                        | 30.49 | 34.60 | 0.00 | 0.12 | 0.00 | 99.93  |
| 40       | TQ-Ccp-14   | 34.25                        | 30.32 | 34.86 | 0.00 | 0.08 | 0.00 | 99.51  |

Table S2 continued

|    |           |       |       |       |      |      |      |        |
|----|-----------|-------|-------|-------|------|------|------|--------|
| 41 |           | 34.23 | 29.90 | 34.76 | 0.00 | 0.03 | 0.00 | 98.92  |
| 42 |           | 34.61 | 30.22 | 34.71 | 0.04 | 0.01 | 0.00 | 99.59  |
| 43 | TQ-Ccp-15 | 34.92 | 30.46 | 34.83 | 0.01 | 0.06 | 0.00 | 100.28 |
| 44 |           | 34.79 | 30.24 | 34.81 | 0.00 | 0.07 | 0.05 | 99.96  |
| 45 |           | 33.36 | 31.18 | 34.15 | 0.00 | 0.02 | 0.00 | 98.71  |
| 46 | TQ-Ccp-16 | 34.86 | 29.76 | 34.50 | 0.09 | 0.05 | 0.00 | 99.25  |
| 47 |           | 34.80 | 30.10 | 34.38 | 0.00 | 0.02 | 0.00 | 99.30  |
| 48 |           | 34.27 | 30.11 | 34.46 | 0.05 | 0.05 | 0.02 | 98.96  |
| 49 | TQ-Ccp-17 | 33.72 | 30.30 | 34.91 | 0.06 | 0.00 | 0.00 | 99.00  |
| 50 |           | 34.98 | 30.71 | 34.85 | 0.00 | 0.10 | 0.00 | 100.64 |
| 51 |           | 33.27 | 31.57 | 34.83 | 0.00 | 0.06 | 0.00 | 99.72  |
| 52 | TQ-Ccp-18 | 34.55 | 30.43 | 34.89 | 0.03 | 0.06 | 0.00 | 99.95  |
| 53 |           | 34.95 | 30.19 | 34.29 | 0.00 | 0.03 | 0.00 | 99.45  |
| 54 |           | 33.58 | 31.44 | 34.25 | 0.08 | 0.07 | 0.00 | 99.42  |
| 55 | TQ-Ccp-19 | 34.19 | 29.35 | 34.94 | 0.15 | 0.07 | 0.00 | 98.70  |
| 56 |           | 34.29 | 30.59 | 34.93 | 0.00 | 0.05 | 0.00 | 99.87  |
| 57 |           | 34.55 | 30.90 | 34.83 | 0.07 | 0.12 | 0.04 | 100.51 |
| 58 | TQ-Ccp-20 | 35.43 | 29.98 | 34.45 | 0.00 | 0.04 | 0.05 | 99.93  |
| 59 |           | 35.07 | 29.73 | 34.56 | 0.00 | 0.02 | 0.00 | 99.37  |
| 60 |           | 34.29 | 30.50 | 34.72 | 0.01 | 0.00 | 0.00 | 99.52  |
| 61 | TQ-Ccp-21 | 35.18 | 30.31 | 34.39 | 0.00 | 0.04 | 0.00 | 99.92  |
| 62 |           | 34.72 | 30.19 | 34.64 | 0.09 | 0.09 | 0.00 | 99.73  |
| 63 |           | 33.62 | 31.27 | 34.16 | 0.00 | 0.03 | 0.00 | 99.08  |
| 64 | TQ-Ccp-22 | 34.50 | 30.03 | 34.88 | 0.01 | 0.06 | 0.01 | 99.50  |
| 65 |           | 34.35 | 29.91 | 34.74 | 0.03 | 0.03 | 0.00 | 99.06  |
| 66 |           | 34.53 | 29.97 | 34.85 | 0.00 | 0.01 | 0.01 | 99.37  |
| 67 | TQ-Ccp-23 | 33.83 | 30.61 | 34.49 | 0.00 | 0.06 | 0.00 | 98.99  |
| 68 |           | 34.42 | 29.75 | 34.56 | 0.00 | 0.03 | 0.00 | 98.75  |
| 69 |           | 33.93 | 30.84 | 34.54 | 0.00 | 0.02 | 0.00 | 99.34  |
| 70 | TQ-Ccp-24 | 34.54 | 30.37 | 34.19 | 0.05 | 0.02 | 0.00 | 99.16  |
| 71 |           | 34.08 | 30.29 | 34.64 | 0.00 | 0.06 | 0.00 | 99.07  |
| 72 |           | 34.78 | 30.08 | 34.75 | 0.00 | 0.06 | 0.00 | 99.67  |
| 73 | TQ-Ccp-25 | 34.97 | 30.53 | 34.72 | 0.01 | 0.04 | 0.02 | 100.30 |
| 74 |           | 33.86 | 30.78 | 35.03 | 0.01 | 0.03 | 0.00 | 99.71  |
| 75 |           | 33.58 | 30.07 | 34.96 | 0.04 | 0.04 | 0.00 | 98.68  |
| 76 | TQ-Ccp-26 | 34.12 | 30.77 | 34.75 | 0.02 | 0.00 | 0.08 | 99.73  |
| 77 |           | 34.71 | 30.33 | 34.74 | 0.02 | 0.05 | 0.00 | 99.85  |
| 78 |           | 34.63 | 30.55 | 34.61 | 0.07 | 0.00 | 0.00 | 99.86  |
| 79 | TQ-Ccp-27 | 33.89 | 30.20 | 34.44 | 0.00 | 0.05 | 0.00 | 98.58  |
| 80 |           | 34.13 | 29.78 | 34.72 | 0.00 | 0.03 | 0.00 | 98.66  |
| 81 |           | 34.10 | 30.95 | 34.22 | 0.00 | 0.03 | 0.00 | 99.29  |
| 82 | TQ-Ccp-28 | 34.49 | 30.57 | 34.65 | 0.00 | 0.06 | 0.01 | 99.78  |
| 83 |           | 34.20 | 30.18 | 34.80 | 0.01 | 0.01 | 0.06 | 99.26  |

Table S2 continued

|     |           |       |       |       |      |      |      |        |
|-----|-----------|-------|-------|-------|------|------|------|--------|
| 84  |           | 34.34 | 30.51 | 34.67 | 0.17 | 0.01 | 0.00 | 99.71  |
| 85  | TQ-Ccp-29 | 34.34 | 30.29 | 34.86 | 0.00 | 0.04 | 0.00 | 99.52  |
| 86  |           | 34.67 | 30.67 | 34.75 | 0.00 | 0.10 | 0.02 | 100.22 |
| 87  |           | 34.97 | 30.48 | 34.27 | 0.01 | 0.05 | 0.00 | 99.78  |
| 88  | TQ-Ccp-30 | 34.53 | 29.99 | 34.92 | 0.01 | 0.06 | 0.02 | 99.55  |
| 89  |           | 34.76 | 31.02 | 34.73 | 0.01 | 0.00 | 0.00 | 100.52 |
| 90  |           | 34.71 | 31.25 | 33.94 | 0.00 | 0.03 | 0.00 | 99.94  |
| 91  | TQ-Ccp-31 | 34.98 | 30.91 | 34.78 | 0.00 | 0.02 | 0.00 | 100.69 |
| 92  |           | 35.37 | 30.25 | 34.37 | 0.09 | 0.03 | 0.00 | 100.10 |
| 93  |           | 33.70 | 31.24 | 34.27 | 0.00 | 0.07 | 0.00 | 99.28  |
| 94  | TQ-Ccp-32 | 34.73 | 30.94 | 34.80 | 0.08 | 0.11 | 0.00 | 100.66 |
| 95  |           | 34.63 | 30.07 | 34.51 | 0.00 | 0.01 | 0.00 | 99.22  |
| 96  |           | 34.00 | 30.81 | 34.12 | 0.07 | 0.04 | 0.03 | 99.06  |
| 97  | TQ-Ccp-33 | 34.09 | 30.31 | 34.44 | 0.00 | 0.02 | 0.02 | 98.89  |
| 98  |           | 34.04 | 31.09 | 34.69 | 0.00 | 0.06 | 0.00 | 99.87  |
| 99  |           | 33.96 | 30.26 | 34.59 | 0.00 | 0.08 | 0.00 | 98.89  |
| 100 | TQ-Ccp-34 | 34.20 | 30.59 | 34.86 | 0.00 | 0.06 | 0.00 | 99.71  |
| 101 |           | 34.68 | 30.37 | 35.05 | 0.00 | 0.04 | 0.00 | 100.15 |
| 102 |           | 34.54 | 30.96 | 34.79 | 0.00 | 0.04 | 0.05 | 100.37 |
| 103 | TQ-Ccp-35 | 33.98 | 29.66 | 35.03 | 0.00 | 0.03 | 0.02 | 98.73  |
| 104 |           | 34.74 | 30.17 | 34.88 | 0.00 | 0.07 | 0.00 | 99.86  |
| 105 |           | 35.55 | 30.28 | 34.68 | 0.01 | 0.01 | 0.00 | 100.53 |
| 106 | TQ-Ccp-36 | 34.51 | 29.91 | 34.97 | 0.04 | 0.05 | 0.01 | 99.49  |
| 107 |           | 33.93 | 30.24 | 34.70 | 0.01 | 0.06 | 0.00 | 98.94  |
| 108 |           | 35.10 | 30.33 | 35.06 | 0.02 | 0.02 | 0.01 | 100.53 |
| 109 | TQ-Ccp-37 | 33.95 | 30.80 | 34.86 | 0.02 | 0.05 | 0.00 | 99.67  |
| 110 |           | 34.11 | 30.87 | 34.68 | 0.00 | 0.02 | 0.00 | 99.66  |
| 111 |           | 34.27 | 30.96 | 34.63 | 0.00 | 0.09 | 0.00 | 99.95  |
| 112 | TQ-Ccp-38 | 33.84 | 31.18 | 34.79 | 0.00 | 0.02 | 0.00 | 99.82  |
| 113 |           | 34.34 | 30.77 | 34.68 | 0.09 | 0.05 | 0.01 | 99.93  |
| 114 |           | 34.18 | 30.66 | 34.47 | 0.09 | 0.05 | 0.00 | 99.45  |
| 115 | TQ-Ccp-39 | 34.51 | 30.37 | 34.49 | 0.00 | 0.07 | 0.00 | 99.43  |
| 116 |           | 34.68 | 30.32 | 34.62 | 0.00 | 0.02 | 0.00 | 99.63  |
| 117 |           | 34.71 | 29.44 | 34.76 | 0.06 | 0.04 | 0.00 | 99.01  |
| 118 | TQ-Ccp-40 | 35.56 | 30.64 | 34.80 | 0.09 | 0.00 | 0.00 | 101.10 |
| 119 |           | 33.78 | 30.38 | 34.56 | 0.00 | 0.03 | 0.00 | 98.74  |
| 120 |           | 33.96 | 31.04 | 34.37 | 0.00 | 0.04 | 0.00 | 99.41  |
| 121 | TQ-Ccp-41 | 34.70 | 30.21 | 34.80 | 0.00 | 0.04 | 0.00 | 99.75  |
| 122 |           | 33.98 | 30.64 | 34.79 | 0.03 | 0.02 | 0.00 | 99.45  |
| 123 |           | 33.68 | 31.37 | 34.33 | 0.00 | 0.06 | 0.00 | 99.44  |
| 124 | TQ-Ccp-42 | 33.48 | 31.28 | 35.22 | 0.00 | 0.05 | 0.02 | 100.04 |
| 125 |           | 33.70 | 31.42 | 35.41 | 0.01 | 0.01 | 0.00 | 100.54 |
| 126 |           | 35.01 | 31.02 | 34.93 | 0.00 | 0.08 | 0.00 | 101.05 |

Table S2 continued

|     |           |       |       |       |      |      |      |        |
|-----|-----------|-------|-------|-------|------|------|------|--------|
| 127 | TQ-Ccp-43 | 35.14 | 30.34 | 35.06 | 0.00 | 0.04 | 0.00 | 100.58 |
| 128 |           | 34.65 | 29.92 | 34.86 | 0.00 | 0.06 | 0.01 | 99.50  |
| 129 |           | 34.86 | 30.51 | 34.68 | 0.03 | 0.07 | 0.01 | 100.17 |
| 130 | TQ-Ccp-44 | 35.36 | 29.51 | 34.85 | 0.00 | 0.01 | 0.02 | 99.75  |
| 131 |           | 34.99 | 30.39 | 34.87 | 0.00 | 0.04 | 0.00 | 100.29 |
| 132 |           | 34.68 | 30.30 | 34.60 | 0.00 | 0.01 | 0.02 | 99.60  |
| 133 | TQ-Ccp-45 | 34.24 | 30.29 | 34.76 | 0.00 | 0.06 | 0.00 | 99.35  |
| 134 |           | 33.41 | 30.96 | 34.84 | 0.00 | 0.05 | 0.00 | 99.27  |
| 135 |           | 34.97 | 30.72 | 34.85 | 0.03 | 0.08 | 0.00 | 100.66 |
| 136 | TQ-Ccp-46 | 34.92 | 30.72 | 34.64 | 0.00 | 0.07 | 0.00 | 100.36 |
| 137 |           | 34.18 | 30.41 | 34.81 | 0.05 | 0.05 | 0.00 | 99.51  |
| 138 |           | 34.16 | 30.27 | 35.01 | 0.15 | 0.10 | 0.00 | 99.68  |
| 139 | TQ-Ccp-47 | 34.45 | 30.50 | 34.87 | 0.08 | 0.04 | 0.00 | 99.94  |
| 140 |           | 35.30 | 30.09 | 34.61 | 0.00 | 0.04 | 0.00 | 100.04 |
| 141 |           | 34.97 | 30.47 | 35.34 | 0.00 | 0.05 | 0.00 | 100.82 |
| 142 | TQ-Ccp-48 | 35.27 | 30.84 | 35.20 | 0.00 | 0.05 | 0.04 | 101.39 |
| 143 |           | 34.95 | 30.34 | 34.83 | 0.03 | 0.03 | 0.00 | 100.18 |
| 144 |           | 33.55 | 31.08 | 34.33 | 0.04 | 0.02 | 0.00 | 99.02  |
| 145 | TQ-Ccp-49 | 34.33 | 30.05 | 34.66 | 0.02 | 0.03 | 0.02 | 99.11  |
| 146 |           | 34.75 | 31.23 | 34.83 | 0.00 | 0.06 | 0.00 | 100.87 |
| 147 |           | 33.84 | 30.02 | 34.90 | 0.06 | 0.06 | 0.00 | 98.87  |
| 148 | TQ-Ccp-50 | 34.52 | 30.59 | 34.97 | 0.00 | 0.03 | 0.00 | 100.11 |
| 149 |           | 34.23 | 29.71 | 35.16 | 0.00 | 0.03 | 0.00 | 99.13  |
| 150 |           | 33.49 | 31.10 | 34.71 | 0.02 | 0.01 | 0.00 | 99.32  |
| 151 | TQ-Ccp-51 | 33.90 | 30.75 | 34.61 | 0.00 | 0.05 | 0.00 | 99.32  |
| 152 |           | 34.00 | 31.41 | 34.17 | 0.03 | 0.03 | 0.00 | 99.64  |
| 153 |           | 33.26 | 31.34 | 34.33 | 0.00 | 0.07 | 0.00 | 99.01  |
| 154 | TQ-Ccp-52 | 34.63 | 30.75 | 34.57 | 0.01 | 0.04 | 0.00 | 99.99  |
| 155 |           | 34.79 | 30.01 | 34.77 | 0.00 | 0.06 | 0.00 | 99.62  |
| 156 |           | 34.56 | 30.54 | 34.94 | 0.00 | 0.01 | 0.00 | 100.05 |
| 157 | TQ-Ccp-53 | 34.85 | 30.98 | 34.75 | 0.00 | 0.04 | 0.01 | 100.63 |
| 158 |           | 35.36 | 30.51 | 34.93 | 0.03 | 0.05 | 0.00 | 100.87 |
| 159 |           | 34.86 | 30.56 | 34.66 | 0.06 | 0.06 | 0.00 | 100.20 |
| 160 | TQ-Ccp-54 | 33.87 | 30.77 | 34.75 | 0.04 | 0.04 | 0.00 | 99.46  |
| 161 |           | 34.61 | 30.74 | 34.58 | 0.00 | 0.02 | 0.00 | 99.94  |
| 162 |           | 33.51 | 31.64 | 34.21 | 0.01 | 0.04 | 0.00 | 99.40  |
| 163 | TQ-Ccp-55 | 34.83 | 30.06 | 35.21 | 0.03 | 0.03 | 0.00 | 100.16 |
| 164 |           | 35.20 | 30.13 | 34.79 | 0.00 | 0.05 | 0.01 | 100.19 |
| 165 |           | 34.94 | 30.37 | 34.98 | 0.00 | 0.06 | 0.00 | 100.35 |
| 166 | TQ-Ccp-56 | 33.83 | 30.77 | 34.80 | 0.00 | 0.03 | 0.00 | 99.44  |
| 167 |           | 35.89 | 29.95 | 34.79 | 0.00 | 0.02 | 0.00 | 100.65 |
| 168 |           | 34.48 | 30.64 | 34.94 | 0.00 | 0.04 | 0.00 | 100.10 |
| 169 | TQ-Ccp-57 | 34.95 | 31.04 | 34.68 | 0.01 | 0.06 | 0.00 | 100.73 |

Table S2 continued

|     |           |       |       |       |      |      |      |        |
|-----|-----------|-------|-------|-------|------|------|------|--------|
| 170 |           | 35.12 | 31.10 | 34.64 | 0.04 | 0.00 | 0.03 | 100.93 |
| 171 |           | 34.29 | 30.92 | 34.49 | 0.01 | 0.02 | 0.00 | 99.74  |
| 172 | TQ-Ccp-58 | 34.55 | 30.05 | 34.55 | 0.03 | 0.08 | 0.00 | 99.25  |
| 173 |           | 33.78 | 30.55 | 34.29 | 0.00 | 0.04 | 0.00 | 98.66  |
| 174 |           | 34.31 | 30.05 | 34.65 | 0.00 | 0.02 | 0.01 | 99.04  |
| 175 | TQ-Ccp-59 | 34.41 | 30.32 | 34.83 | 0.00 | 0.09 | 0.02 | 99.66  |
| 176 |           | 34.57 | 30.59 | 34.70 | 0.00 | 0.01 | 0.00 | 99.86  |
| 177 |           | 34.59 | 30.73 | 34.89 | 0.00 | 0.01 | 0.01 | 100.22 |
| 178 | TQ-Ccp-60 | 35.02 | 30.58 | 35.28 | 0.00 | 0.02 | 0.00 | 100.89 |
| 179 |           | 34.87 | 30.44 | 34.48 | 0.00 | 0.06 | 0.00 | 99.85  |
| 180 |           | 35.81 | 30.14 | 35.08 | 0.00 | 0.02 | 0.01 | 101.07 |
| 181 | TQ-Ccp-61 | 34.62 | 29.78 | 34.43 | 0.00 | 0.00 | 0.00 | 98.84  |
| 182 |           | 33.58 | 30.96 | 34.08 | 0.04 | 0.01 | 0.00 | 98.67  |
| 183 |           | 33.64 | 31.39 | 34.39 | 0.00 | 0.02 | 0.01 | 99.45  |
| 184 | TQ-Ccp-62 | 33.37 | 31.25 | 34.42 | 0.00 | 0.04 | 0.00 | 99.08  |
| 185 |           | 34.12 | 30.61 | 34.25 | 0.05 | 0.06 | 0.00 | 99.09  |
| 186 |           | 33.26 | 31.54 | 34.55 | 0.00 | 0.07 | 0.00 | 99.42  |
| 187 | TQ-Ccp-63 | 34.20 | 31.35 | 34.54 | 0.00 | 0.02 | 0.00 | 100.11 |
| 188 |           | 33.91 | 31.38 | 34.50 | 0.05 | 0.04 | 0.00 | 99.88  |
| 189 |           | 34.45 | 30.21 | 34.43 | 0.00 | 0.05 | 0.02 | 99.16  |
| 190 | TQ-Ccp-64 | 33.89 | 31.47 | 34.65 | 0.01 | 0.00 | 0.00 | 100.02 |
| 191 |           | 34.44 | 31.71 | 34.30 | 0.01 | 0.04 | 0.00 | 100.50 |
| 192 |           | 34.48 | 30.60 | 34.47 | 0.04 | 0.04 | 0.04 | 99.66  |
| 193 | TQ-Ccp-65 | 33.91 | 31.29 | 34.26 | 0.00 | 0.05 | 0.02 | 99.53  |
| 194 |           | 33.83 | 31.23 | 34.23 | 0.00 | 0.03 | 0.00 | 99.33  |
| 195 |           | 33.74 | 30.99 | 34.26 | 0.00 | 0.06 | 0.00 | 99.05  |
| 196 | TQ-Ccp-66 | 33.33 | 31.32 | 34.41 | 0.00 | 0.07 | 0.00 | 99.12  |
| 197 |           | 34.38 | 30.98 | 34.25 | 0.00 | 0.03 | 0.00 | 99.65  |
| 198 |           | 34.17 | 31.12 | 34.16 | 0.00 | 0.05 | 0.00 | 99.50  |
| 199 | TQ-Ccp-67 | 33.91 | 31.13 | 34.15 | 0.05 | 0.04 | 0.03 | 99.29  |
| 200 |           | 34.32 | 31.40 | 34.23 | 0.00 | 0.04 | 0.01 | 100.00 |
| 201 |           | 34.18 | 31.36 | 34.34 | 0.00 | 0.06 | 0.00 | 99.94  |
| 202 | TQ-Ccp-68 | 34.30 | 31.15 | 34.73 | 0.00 | 0.08 | 0.00 | 100.26 |
| 203 |           | 33.64 | 31.11 | 34.25 | 0.00 | 0.02 | 0.00 | 99.01  |
| 204 |           | 33.87 | 31.12 | 34.42 | 0.00 | 0.07 | 0.00 | 99.47  |
| 205 | TQ-Ccp-69 | 33.85 | 30.50 | 34.66 | 0.00 | 0.04 | 0.00 | 99.04  |
| 206 |           | 33.36 | 31.27 | 34.56 | 0.01 | 0.07 | 0.00 | 99.26  |
| 207 |           | 34.05 | 31.34 | 34.50 | 0.00 | 0.06 | 0.00 | 99.95  |
| 208 | TQ-Ccp-70 | 33.78 | 31.11 | 34.73 | 0.00 | 0.04 | 0.00 | 99.65  |
| 209 |           | 33.89 | 30.84 | 34.07 | 0.00 | 0.02 | 0.00 | 98.83  |
| 210 |           | 33.60 | 31.27 | 34.38 | 0.00 | 0.06 | 0.00 | 99.31  |
| 211 | TQ-Ccp-71 | 33.47 | 31.44 | 34.41 | 0.01 | 0.04 | 0.00 | 99.36  |
| 212 | TQ-Ccp-72 | 33.67 | 31.20 | 34.46 | 0.04 | 0.04 | 0.04 | 99.44  |

Table S2 continued

|     |             |              |              |              |             |             |             |              |
|-----|-------------|--------------|--------------|--------------|-------------|-------------|-------------|--------------|
| 213 | TQ-Ccp-73   | 34.28        | 30.00        | 34.69        | 0.00        | 0.01        | 0.00        | 98.98        |
| 214 | TQ-Ccp-74   | 34.57        | 29.87        | 34.47        | 0.00        | 0.03        | 0.05        | 98.99        |
| 215 | TQ-Ccp-75   | 34.99        | 30.53        | 34.05        | 0.00        | 0.03        | 0.00        | 99.59        |
| 216 | TQ-Ccp-76   | 34.78        | 30.40        | 34.23        | 0.00        | 0.08        | 0.00        | 99.48        |
| 217 | TQ-Ccp-77   | 35.05        | 30.06        | 34.25        | 0.00        | 0.03        | 0.06        | 99.45        |
| 218 | TQ-Ccp-78   | 34.45        | 29.90        | 34.59        | 0.00        | 0.08        | 0.00        | 99.02        |
| 219 | TQ-Ccp-79   | 34.45        | 30.37        | 34.36        | 0.03        | 0.02        | 0.01        | 99.25        |
| 220 | TQ-Ccp-80   | 34.33        | 29.92        | 34.55        | 0.00        | 0.02        | 0.00        | 98.82        |
| 221 | TQ-Ccp-81   | 35.11        | 29.82        | 34.06        | 0.07        | 0.07        | 0.00        | 99.13        |
| 222 | TQ-Ccp-82   | 33.80        | 31.18        | 34.33        | 0.07        | 0.03        | 0.00        | 99.40        |
| 223 | TQ-Ccp-83   | 34.65        | 29.97        | 34.33        | 0.18        | 0.07        | 0.00        | 99.20        |
| 224 | TQ-Ccp-84   | 34.70        | 29.69        | 34.74        | 0.00        | 0.06        | 0.03        | 99.22        |
| 225 | TQ-Ccp-85   | 34.54        | 30.01        | 34.48        | 0.00        | 0.04        | 0.00        | 99.06        |
| 226 | TQ-Ccp-86   | 35.13        | 30.96        | 34.27        | 0.00        | 0.05        | 0.00        | 100.40       |
| 227 | TQ-Ccp-87   | 34.68        | 29.92        | 34.08        | 0.01        | 0.05        | 0.00        | 98.73        |
| 228 | TQ-Ccp-88   | 34.15        | 30.69        | 34.62        | 0.00        | 0.03        | 0.03        | 99.52        |
| 229 | TQ-Ccp-89   | 33.75        | 30.69        | 34.39        | 0.01        | 0.08        | 0.04        | 98.96        |
| 230 | TQ-Ccp-90   | 34.57        | 29.85        | 34.46        | 0.00        | 0.08        | 0.03        | 98.99        |
| 231 | TQ-Ccp-91   | 35.40        | 30.27        | 34.07        | 0.00        | 0.02        | 0.03        | 99.79        |
| 232 | TQ-Ccp-92   | 35.08        | 29.01        | 34.44        | 0.05        | 0.05        | 0.00        | 98.63        |
| 233 | TQ-Ccp-93   | 34.99        | 30.36        | 34.14        | 0.08        | 0.04        | 0.00        | 99.61        |
| 234 | TQ-Ccp-94   | 33.83        | 31.11        | 34.37        | 0.00        | 0.05        | 0.00        | 99.36        |
|     | <b>Mean</b> | <b>34.35</b> | <b>30.54</b> | <b>34.62</b> | <b>0.02</b> | <b>0.04</b> | <b>0.01</b> | <b>99.59</b> |
|     | SD          | 0.55         | 0.52         | 0.28         | 0.03        | 0.02        | 0.01        |              |
|     | RSD (%)     | 0.80         | 0.84         | 0.40         |             |             |             |              |

Table S3 Copper isotope compositions of the doping solutions analyzed by MC-ICP-MS<sup>a</sup>

| Molar element ratio  | $\delta^{65}\text{Cu}_{\text{ERM-647}}$ (‰) | 2SD (n=3) |
|----------------------|---------------------------------------------|-----------|
| Fe:Cu = 2:3          | -0.04                                       | 0.05      |
| Fe:Cu = 1:1          | 0.00                                        | 0.05      |
| Fe:Cu = 2:1          | -0.03                                       | 0.03      |
| Fe:Cu = 5:1          | 0.01                                        | 0.04      |
| Fe:Cu = 10:1         | 0.00                                        | 0.02      |
| As:Cu = 1:20         | -0.03                                       | 0.02      |
| As:Cu = 1:10         | -0.02                                       | 0.03      |
| As:Cu = 1:5          | -0.01                                       | 0.01      |
| As:Cu = 1:2          | 0.00                                        | 0.01      |
| As:Cu = 1:1          | 0.00                                        | 0.01      |
| Fe:As:Cu = 2:1:2     | -0.05                                       | 0.03      |
| Fe:As:Cu = 1:1:1     | -0.03                                       | 0.02      |
| Fe:As:Cu = 1:2:1     | -0.03                                       | 0.04      |
| Fe:S:Cu = 2:1:2      | 0.01                                        | 0.04      |
| Fe:S:Cu = 1:1:1      | 0.00                                        | 0.01      |
| Fe:S:Cu = 1:2:1      | -0.01                                       | 0.03      |
| Fe:S:As:Cu = 2:2:1:2 | 0.00                                        | 0.00      |
| Fe:S:As:Cu = 1:1:1:1 | -0.01                                       | 0.01      |
| Fe:S:As:Cu = 1:1:2:1 | -0.02                                       | 0.04      |

<sup>a</sup>  $\delta^{65}\text{Cu}_{\text{ERM-647}} = [({}^{65}\text{Cu}/{}^{63}\text{Cu})_{\text{ERM-647 with doping elements}} / ({}^{65}\text{Cu}/{}^{63}\text{Cu})_{\text{ERM-647}} - 1] \times 1000\text{‰}$ .



Fig. S1

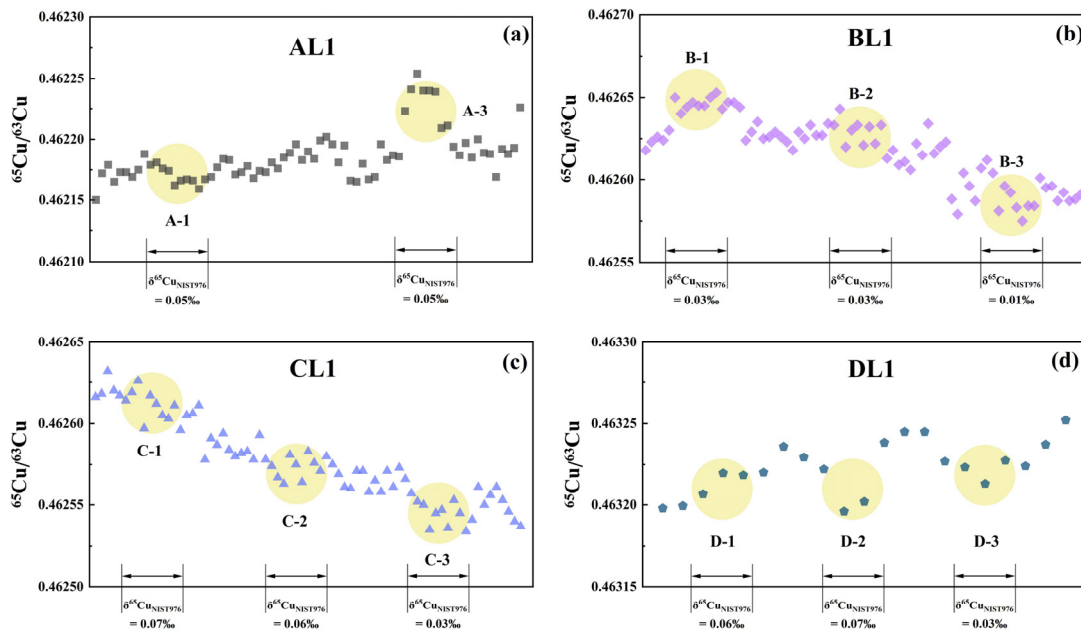

Fig. S1 The raw  $^{65}\text{Cu}/^{63}\text{Cu}$  of the ablation spots in the lines AL1 (a), BL1 (b), CL1 (c), and DL1 (d) on the four large chalcopyrite fragments in the mount III. The yellow circles show the corresponding positions of the micro-drilled samples along the lines (X axis), and their  $\delta^{65}\text{Cu}_{\text{NIST976}}$  were analyzed by solution MC-ICP-MS (not related with Y axis). The detailed positions of the lines and the micro-drill sampling areas on the fragments are shown in Fig. 1c.
